# Supplementary material for: JFM調査レポート 自治体における銀行等引受債発行状況及び指定金融機関との取引の現状 : ｢銀行等引受債･指定金融機関との関わり方に関するアンケート｣結果報告
Source: publisher site journal article supplement (doi:10.3762/bjoc.13.148), 2014-04-01
Supplement: Additional file 1 [file 1860-5397-13-148-S1.pdf]

# Supporting Information

for

## 2-Methyl-2,4-pentanediol (MPD) boosts as detergent-substitute the performance of $\beta$ -barrel hybrid catalyst for phenylacetylene polymerization

Julia Kinzel<sup>1#</sup>, Daniel F. Sauer<sup>2#</sup>, Marco Bocola<sup>1</sup>, Marcus Arlt<sup>1</sup>, Tayebah Mirzaei Garakani<sup>1,3</sup>, Andreas Thiel<sup>2</sup>, Klaus Beckerle<sup>2</sup>, Tino Polen<sup>4</sup>, Jun Okuda<sup>2</sup> and Ulrich Schwaneberg<sup>1,3\*</sup>

Address: <sup>1</sup>Institute of Biotechnology, RWTH Aachen University, Worringer Weg 3, 52074 Aachen, Germany, <sup>2</sup>Institut für Anorganische Chemie, RWTH Aachen University, Landoltweg 1, 52074 Aachen, Germany, <sup>3</sup>DWI - Leibniz Institute for Interactive Materials e.V., Forckenbeckstr. 50, 52056, Aachen, Germany and <sup>4</sup>Institute of Bio- und Geosciences, IBG-1: Biotechnology, Forschungszentrum Jülich GmbH, 52425 Jülich, Germany

Email: Ulrich Schwaneberg\* - u.schwaneberg@biotec.rwth-aachen.de

\* Corresponding author

# Shared first authorship

### CD spectra of unmodified FhuA $\Delta$ CVF<sup>tev</sup> directly after refolding and after eight weeks, Thioglo<sup>®</sup> 1 titration and DLS results

#### Table of content

1. Circular dichroism (CD) spectroscopy of unmodified FhuA  $\Delta$ CVF<sup>tev</sup>
2. Thioglo<sup>®</sup> 1 titration of FhuA  $\Delta$ CVF<sup>tev</sup> and Rh-FhuA  $\Delta$ CVF<sup>tev</sup>
3. Dynamic light scattering (DLS) analysis
4. References

## 1. Circular dichroism (CD) spectroscopy of unmodified FhuA $\Delta$ CVF<sup>tev</sup>

Structural integrity of SDS-denatured transmembrane protein FhuA  $\Delta$ CVF<sup>tev</sup> was confirmed after refolding by dialysis against sodium phosphate buffer with the addition of 1 mM EDTA and 50 mM 2-methyl-2,4-pentanediol (MPD) as refolding agent. It was shown that FhuA  $\Delta$ CVF<sup>tev</sup> was refolded and folding is kept up to eight weeks.

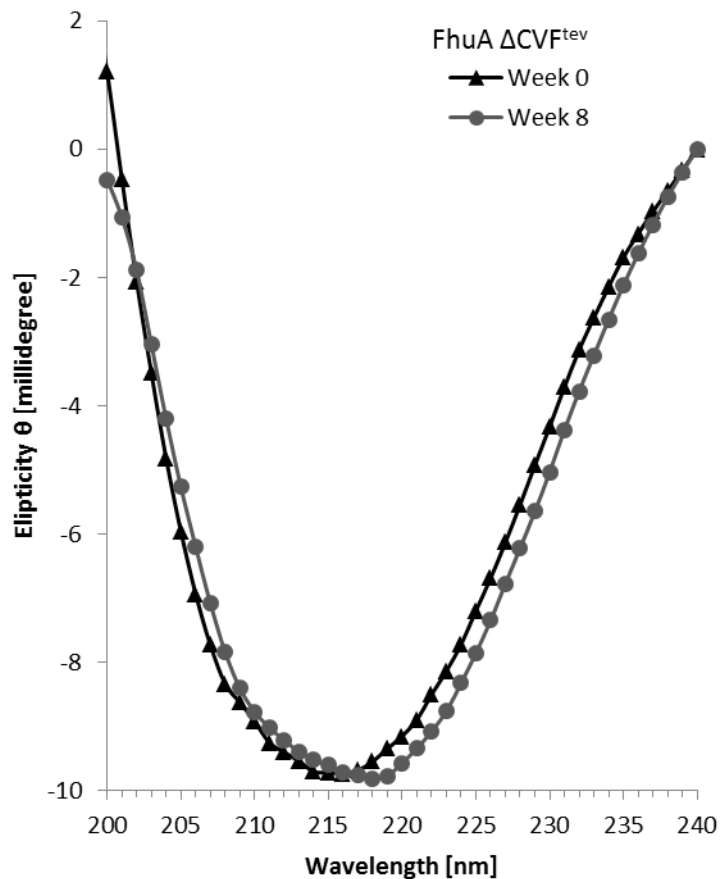

**Figure S1:** CD spectroscopy of FhuA  $\Delta$ CVF<sup>tev</sup> in presence of 2-methyl-2,4-pentanediol as refolding agent after A) refolding and B) after eight weeks. The minimum around 215 nm [1] indicates a proper folding of the transmembrane protein in both cases.

## 2. Thioglo<sup>®</sup> 1 titration of FhuA $\Delta$ CVF<sup>tev</sup> and Rh-FhuA $\Delta$ CVF<sup>tev</sup>

There are in total five cysteine residues in the protein sequence of FhuA  $\Delta$ CVF<sup>tev</sup>. Four cysteine residues are involved in disulfide bonds according to original amino acid sequence of FhuA. A freely accessible cysteine residues was introduced at amino acid position 545 of FhuA  $\Delta$ CVF<sup>tev</sup> (based on PDB id: 1BY3 [2], FhuA wildtype) as previously published [3-4]. The presence of the catalyst in **2** linked to Cys545 was confirmed by decreased Thioglo<sup>®</sup> 1 fluorescence compared to **1** [3-5].

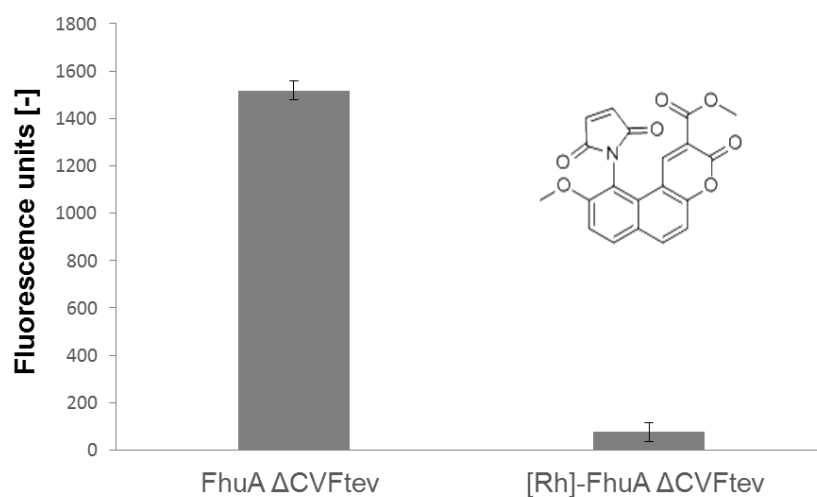

**Figure S2:** Titration of cysteines of FhuA  $\Delta$ CVF<sup>tev</sup> in the presence of 2-methyl-2,4-pentanediol with the fluorescent thiol reagent Thioglo<sup>®</sup> 1.

### 3. Dynamic light scattering (DLS) analysis

To show the interaction of the phenylacetylene with the detergent polyethylene polyethyleneglycol (PE-PEG), DLS measurements were performed (Figure S3).

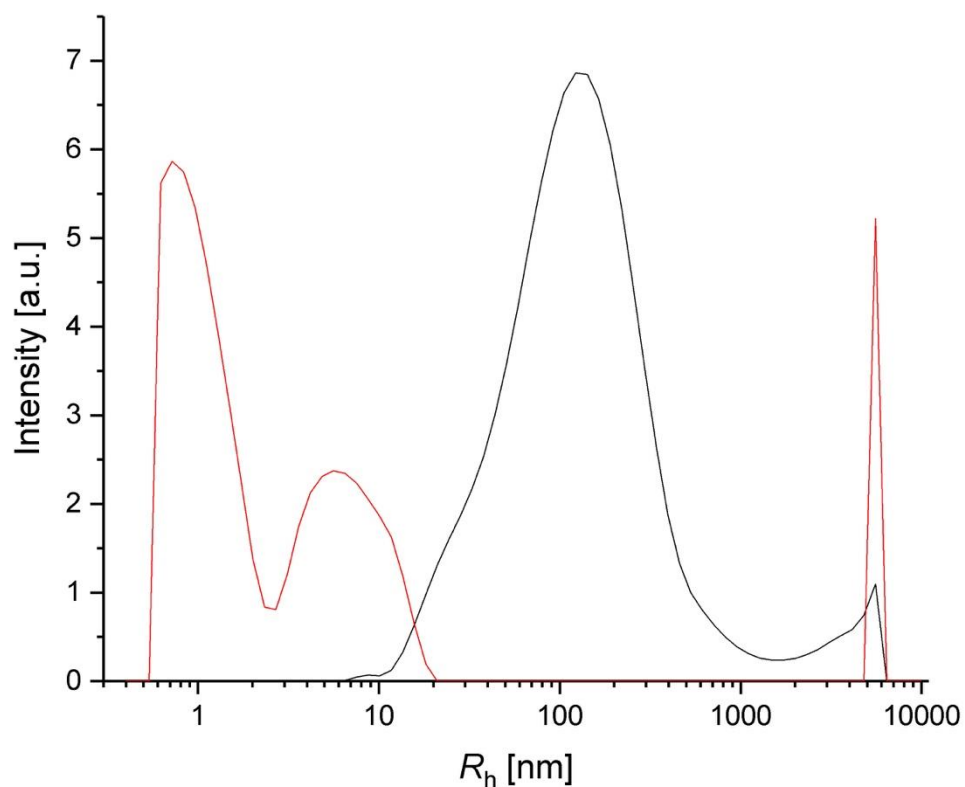

**Figure S3:** Dynamic light scattering measurements of PE-PEG buffer (black) and PE-PEG buffer containing phenylacetylene (red). PE-PEG, polyethylene polyethyleneglycol

A clear distortion of the micelles formed by PE-PEG is observed upon the addition of phenylacetylene. This effect is related to the observed protein precipitation when PE-PEG is used as refolding reagent.

#### 4. References

1. Johnson, W. C., Jr., *Annual review of biophysics and biophysical chemistry* **1988**, *17*, 145-166.
2. Locher, K. P., Rees, B., Koebnik, R., Mitschler, A., Moulinier, L., Rosenbusch, J. P., Moras, D., *Cell* **1998**, *95*, 771-778.
3. Philippart, F., Arlt, M., Gotzen, S., Tenne, S. J., Bocola, M., Chen, H. H., Zhu, L. L., Schwaneberg, U., Okuda, J., *Chem-Eur J* **2013**, *19*, 13865-13871.
4. Sauer, D. F., Bocola, M., Broglia, C., Arlt, M., Zhu, L. L., Brocker, M., Schwaneberg, U., Okuda, J., *Chem-Asian J* **2015**, *10*, 177-182.
5. Wright, S. K., Viola, R. E., *Analytical biochemistry* **1998**, *265*, 8-14.
